# Supplementary material for: Overabundance of Asaia and Serratia Bacteria Is Associated with Deltamethrin Insecticide Susceptibility in Anopheles coluzzii from Agboville, Côte d’Ivoire
Source: PubMed Central journal article supplement (PMC8528120; doi:10.1128/spectrum.00157-21), 2021-10-20

## Description of Supplementary Files

File name: **Table S1. Numbers of mosquitoes selected for DNA extraction and 16S rRNA sequencing.** Mosquitoes were allocated to a concentration/time group based on the concentration of deltamethrin to which they were exposed, the period of follow up post exposure and whether they survived exposure. A selection from each group were pooled in groups of three and sequenced.

File name: **Table S2. Summary statistics of raw sequencing outputs and resulting data following denoising with Dada2 and filtering.**

File name: **Table S3. Relative abundances of bacterial species present in mosquitoes, grouped by age and resistance status.** Taxa are annotated to genus or lowest possible taxonomic level (square brackets).

File name: **Table S4. Beta diversity outputs, showing no significant difference between rarefied and non-rarefied data.** Samples which fail to meet the rarefaction depth are excluded from analysis, therefore the sample sizes of rarefied data are reduced.

File name: **Table S5. Differential rankings for features and taxa present in 2-3 day old *An. coluzzii*, as computed by Songbird.**

File name: **Figure S1. Quality plots for forward and reverse untrimmed reads, generated in Qiime2.** Low quality forward reads resulted in sequence loss due to failure of strands to merge during denoising, therefore only the reverse reads were used for downstream analysis.

File name: **Figure S2. Box plots showing Shannon index of diversity and Faith's Phylogenetic Diversity in 2-3 day old *An. coluzzii*.** Upper and lower limits of boxes represent first and third quintiles of the median (dark horizontal line).

File name: **Figure S3. Stacked bar plot showing relative abundance of taxa present in 2 day old and 5 day old *An. coluzzii* grouped by resistance phenotype.** Taxa are annotated to genus or lowest possible taxonomic level. Taxa present at less than 1% abundance are grouped together and coloured in grey.

File name: **Figure S4. Songbird model.** Blue line is trained on the dataset and is a predictor of model accuracy in contrast to the null hypothesis (orange). Illustrates the accuracy of model prediction and proportion of variance in microbial composition explained by resistance phenotype.

File name: **Figure S5. Volcano plot of differentially abundant bacterial taxa in 2-3 day old *An. coluzzii*,** as computed by analysis of composition of microbiomes (ANCOM).

**Table S1:** Numbers of mosquitoes selected for DNA extraction and 16S rRNA sequencing. Mosquitoes were allocated to a concentration/time group based on the concentration of deltamethrin to which they were exposed, the period of follow up post exposure and whether they survived exposure. A selection from each group were pooled in groups of three and sequenced.

| Resistance phenotype | Description                                                                                      | Concentration /time group | Age at death | Number of individuals | Number selected for sequencing (#pools) |
|----------------------|--------------------------------------------------------------------------------------------------|---------------------------|--------------|-----------------------|-----------------------------------------|
| Susceptible          | Knocked-down at 60 minutes post exposure to the diagnostic dose (1x) deltamethrin.               | Susceptible               | 2-3 days     | 97                    | 87 (29)                                 |
| Resistant            | Survivors at 60 minutes post exposure to 5x deltamethrin                                         | 5xRes60                   | 2-3 days     | 83                    | 30 (10)                                 |
|                      | Survivors at 60 minutes post exposure to 10x deltamethrin                                        | 10xRes60                  | 2-3 days     | 89                    | 21(7)                                   |
|                      | Survivors at 72 hours post exposure to 5x deltamethrin                                           | 5xRes72                   | 5-6 days     | 24                    | 24(8)                                   |
|                      | Survivors at 72 hours post exposure to 10x deltamethrin                                          | 10xRes72                  | 5-6 days     | 33                    | 12 (4)                                  |
|                      | Survivors at 72 hours post exposure to diagnostic dose (1x) deltamethrin                         | 1xRes72                   | 5-6 days     | 55                    | 36 (12)                                 |
| Controls             | Mosquitoes from control bottle which were alive 60 minutes after the initiation of bioassay      | ControlA60                | 2-3 days     | 57                    | 42 (14)                                 |
|                      | Mosquitoes from control bottle which were alive 72 hours after the initiation of bioassay        | ControlA72                | 5-6 days     | 69                    | 30 (10)                                 |
| Blanks               | 70% Ethanol which underwent same DNA extraction and 16S rRNA sequencing as samples               | Ethanol blank             | N/A          | 1                     | 1 (1)                                   |
|                      | Sterile, RNase free water which underwent same DNA extraction and 16S rRNA sequencing as samples | Water blank               |              | 3                     | 3 (1)                                   |

Forward Reads

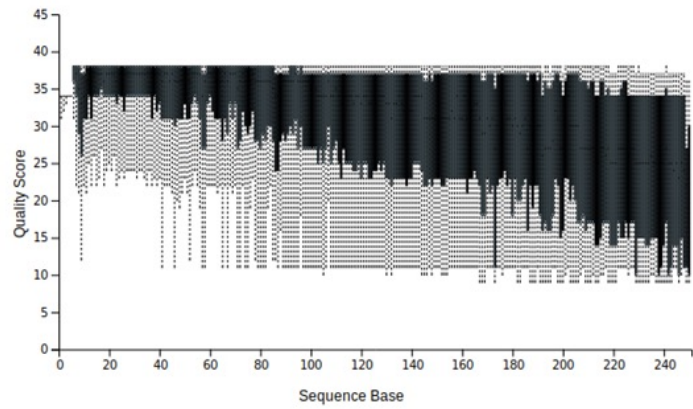

Reverse Reads

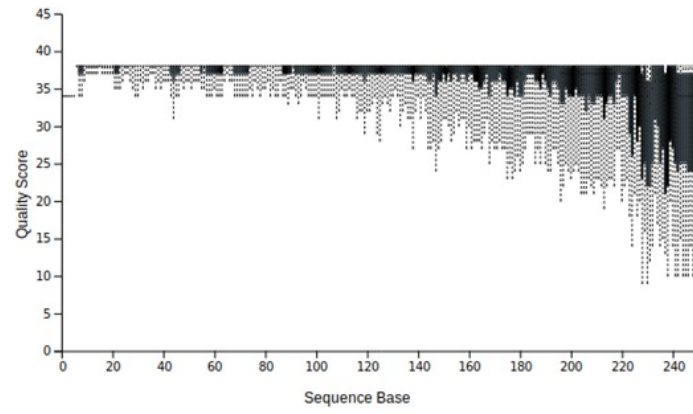

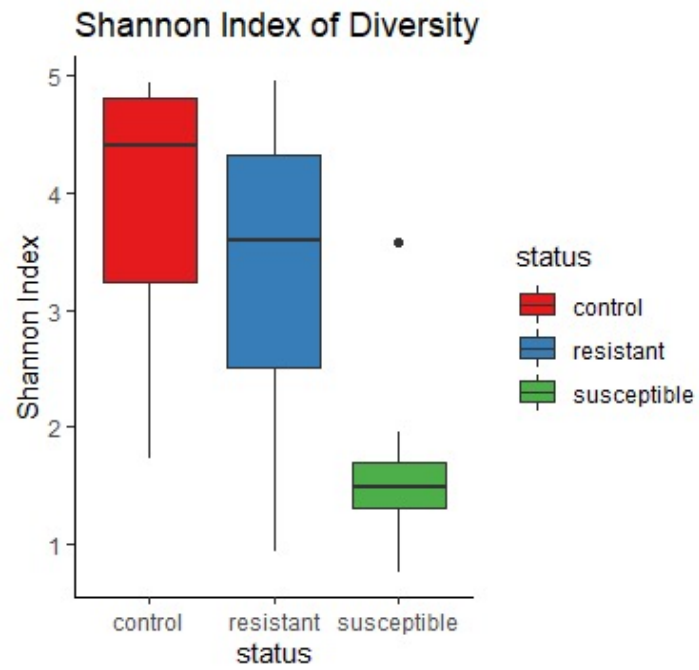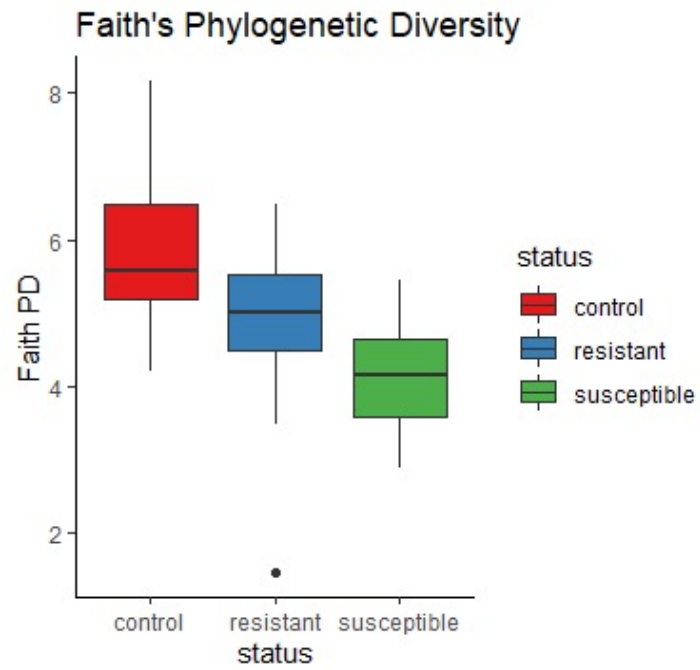



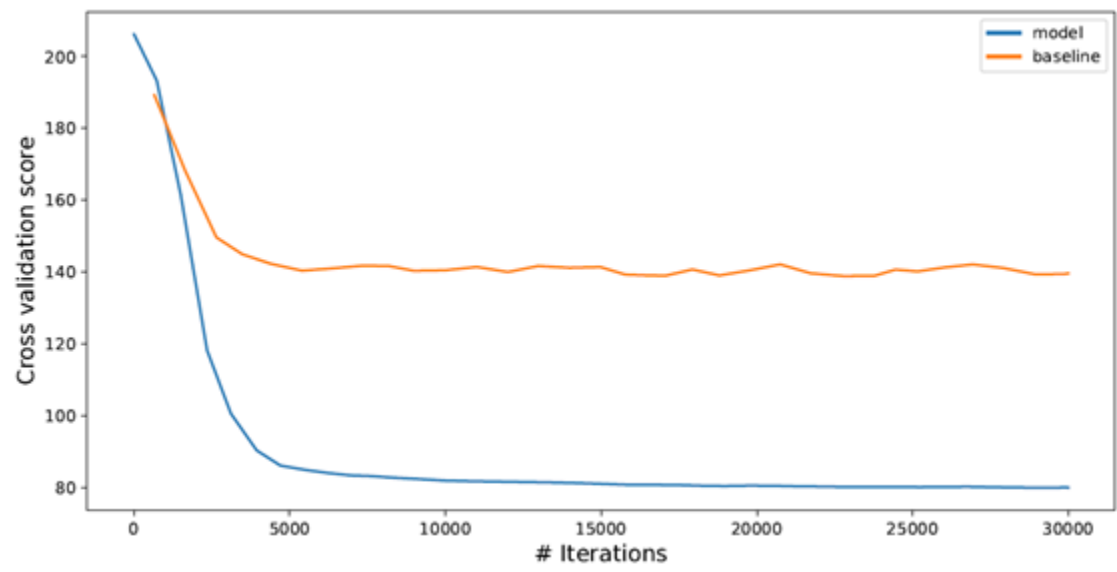

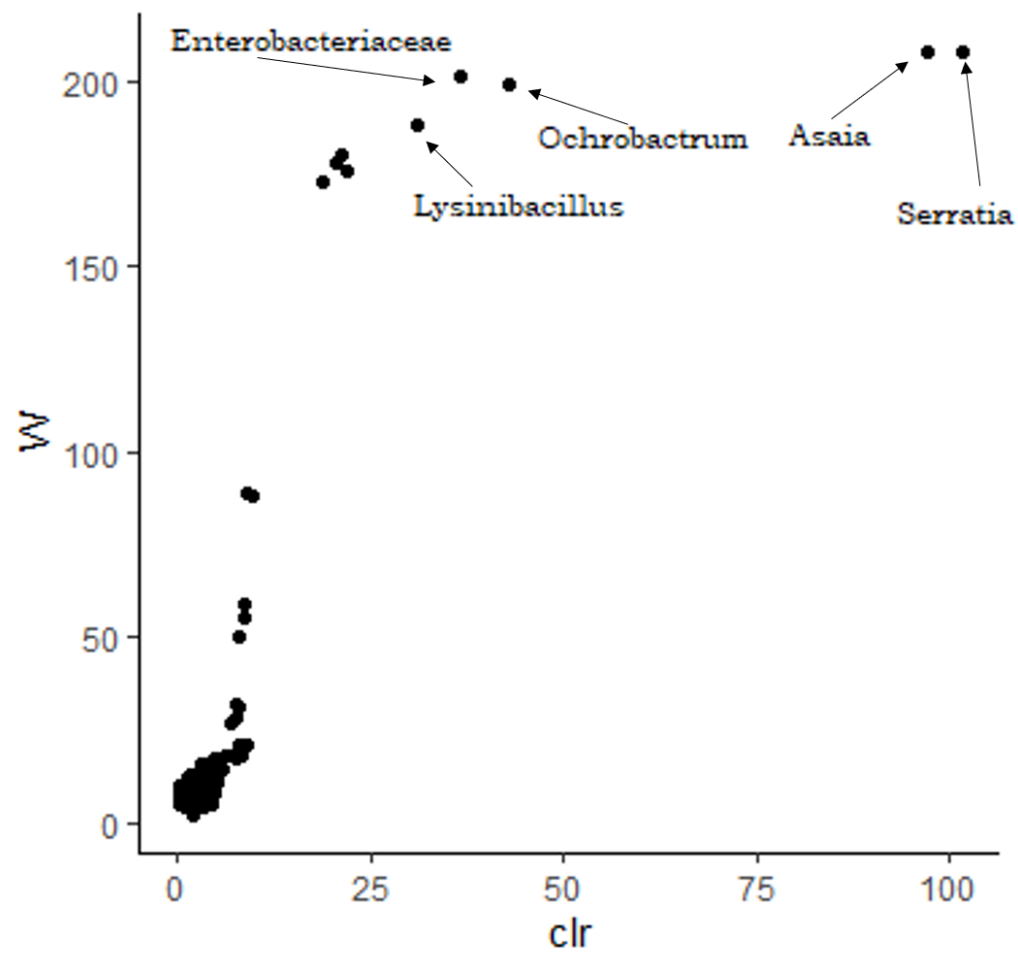

Supplement: spectrum00157-21_supp_1_seq7.pdf [file spectrum00157-21_supp_1_seq7.pdf]
